# Supplementary material for: Development of Wash-Durable Antimicrobial Cotton Fabrics by In Situ Green Synthesis of Silver Nanoparticles and Investigation of Their Antimicrobial Efficacy against Drug-Resistant Bacteria
Source: MDPI journal article supplement (doi:10.3390/antibiotics11070864), 2022-06-27
Supplement: s1 [file s1]

## Supplementary

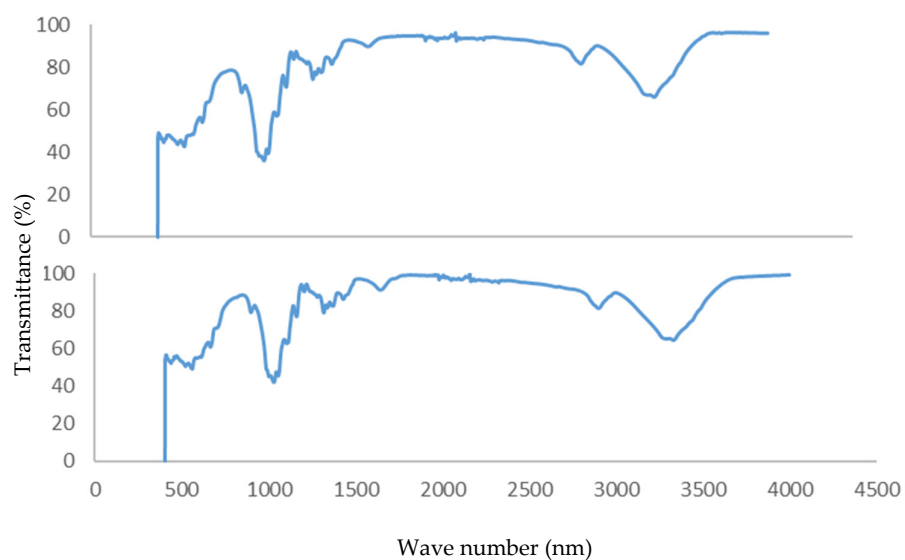

**Figure S1.** Fourier-Transform Infrared spectra of (A) Mercerized cotton fabric without AgNP treatment (B) AgNP treated mercerized cotton fabric.

**Table S1.** Zeta-Potential of Mercerized and un-mercerized cotton fabric.

| SAMPLE                | ZETA POTENTIAL (mV) |
|-----------------------|---------------------|
| Without Mercerization | -35.27              |
| Mercerization         | -60.9               |

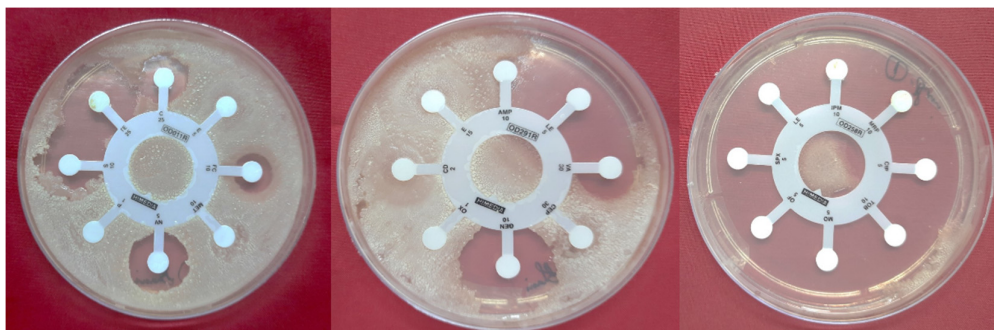

Figure S2: Antibiotic disc diffusion assay against *B. licheniformis*.

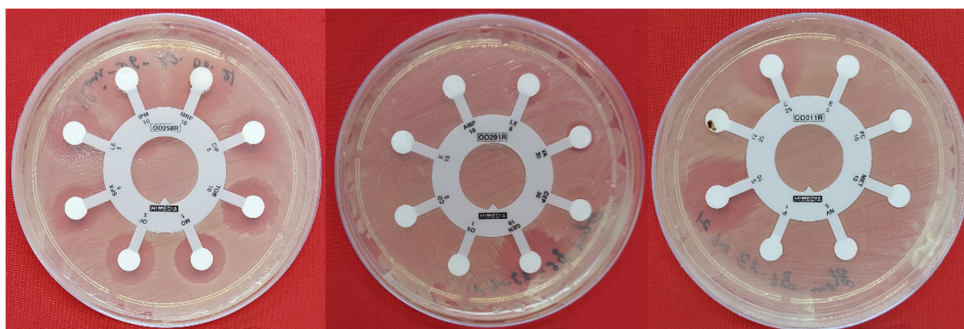

Figure S3: Antibiotic disc diffusion assay against *E. coli*.

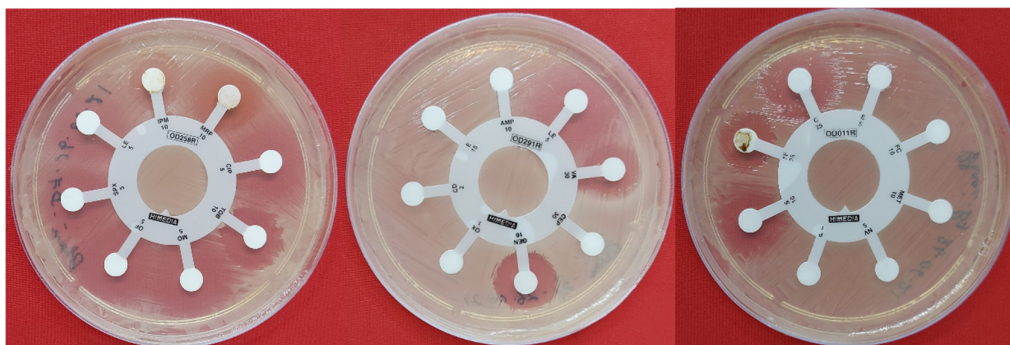

Figure S4: Antibiotic disc diffusion assay against *K. pneumoniae*.

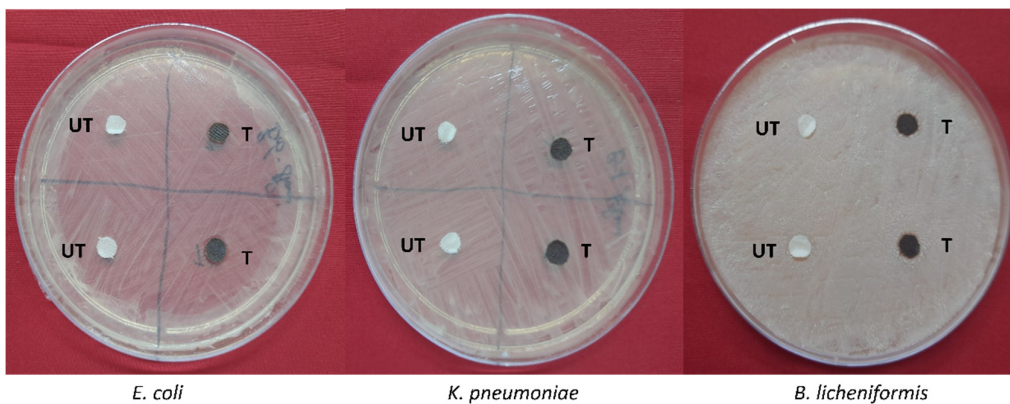

*E. coli*

*K. pneumoniae*

*B. licheniformis*

Figure S5: Disc diffusion assay of the fabric (control and AgNP treated) against the three test bacteria.

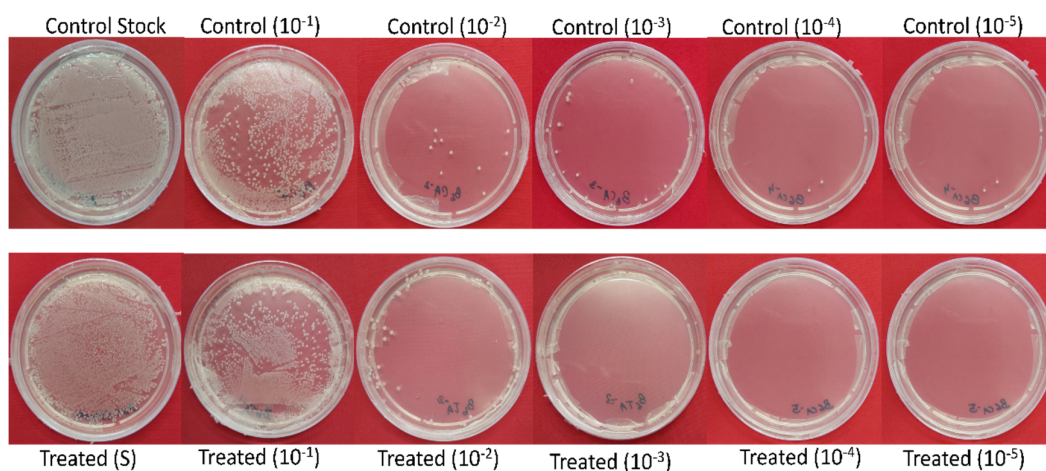

**Figure S6. The number of *E. coli* colonies formed (CFU mL<sup>-1</sup>) were counted after exposing to both treated and untreated fabric.**

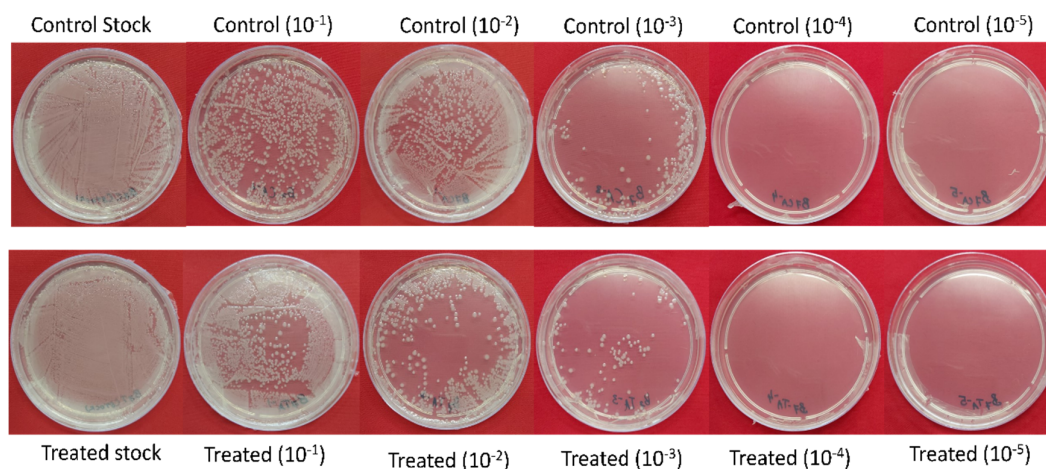

**Figure S7. The number of *K. pneumoniae* colonies formed (CFU mL<sup>-1</sup>) were counted after exposing to both treated and untreated fabric.**



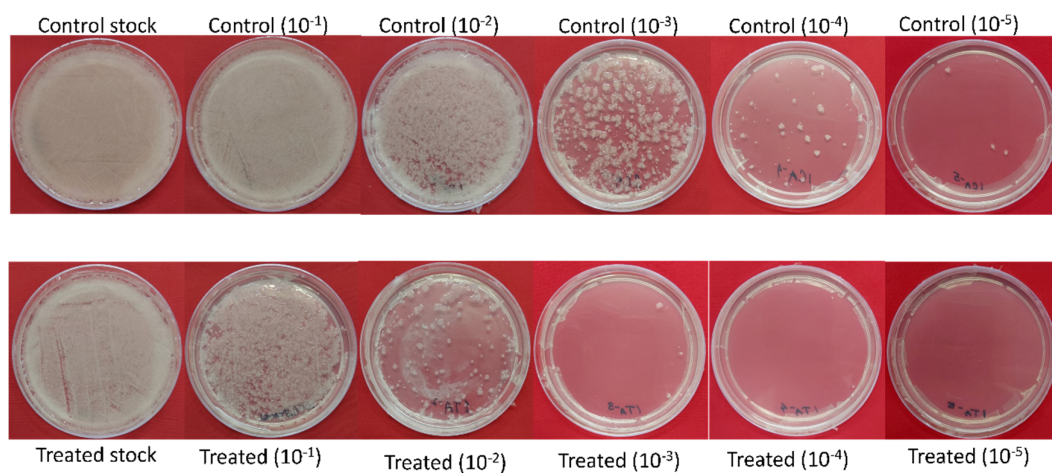

**Figure S8. The number of *B. licheniformis* colonies formed (CFU mL<sup>-1</sup>) were counted after exposing to both treated and untreated fabric.**
